# Supplementary material
Source: Elsevier journal article supplement (https://www.sciencedirect.com/science/article/pii/S1576988721000443)
Supplement: mmc1 [file S1576988721000443:mmc1.pdf]

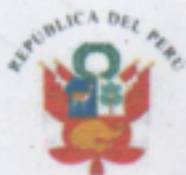

PERÚ

Ministerio de  
Defensa

Fuerza Aérea del Perú

Hospital Central de la  
Fuerza Aérea del Perú

"AÑO DE LA UNIVERSALIZACIÓN DE LA SALUD"  
"DECENIO DE LA IGUALDAD DE OPORTUNIDADES PARA LAS MUJERES Y HOMBRES"

Miraflores,

01 JUL 2020

NC-50-HCDE-Nº 008

Señora

Doctora

**SABINA MENDIVIL TUCHIA**

Medico Infectólogo del Hospital Central FAP

CIUDAD.-

Ref.: Solicitud s/n del 30-06-2020

Tengo el agrado de dirigirme a usted, a fin de expresar mi cordial saludo y en relación con el documento de la referencia, comunicarle la aprobación para la recolección de datos para la ejecución de su proyecto de investigación no Experimental titulado **"Factores asociados al no desarrollo de inmunogenicidad en adultos vacunados contra el virus de la hepatitis B"** en este Hospital Central FAP, durante el mes de **JULIO** del presente año, respetando las Buenas Prácticas Clínicas y demás normatividad de la materia que protegen a los sujetos en la investigación clínica.

Sin otro particular, aprovecho la oportunidad para manifestarle los sentimientos de mi mayor consideración y estima.

Dios Guarde a Ud.

El Coronel FAP

**EDUARDO VASQUEZ MENDOZA**

Presidente del Comité de Ética en Investigación

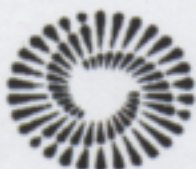

BICENTENARIO  
PERÚ 2021

**EL PERÚ PRIMERO**

Av. Aramburú Cdra. 2 S/N Miraflores  
Central 5135300 – Anexo 2651
